# Supplementary material for: Association between Blood Mercury Concentration and Prevalence of Borderline Hypercholesterolemia among Adolescents: The Korea National Health and Nutrition Examination Survey (KNHANES) 2010–2013 and 2016
Source: MDPI journal article supplement (doi:10.3390/toxics9100242), 2021-09-29
Supplement: s1 [file s1]

# Supplementary Materials: Association Between Blood Mercury Concentration and Prevalence of Borderline Hypercholesterolemia among Adolescents: the Korea National Health and Nutrition Examination Survey (KNHANES) 2010-2013 and 2016

Taiyue Jin, Eun Young Park, Byungmi Kim and Jin-Kyoung Oh

**Table S1.** Classification of lipid and lipoprotein levels (mg/dL) in adolescents.

|                           |                 | Acceptable | Borderline | Overt |
|---------------------------|-----------------|------------|------------|-------|
| Dyslipidemia <sup>a</sup> |                 |            |            |       |
| Hypercholesterolemia      | TC              | < 170      | 170-199    | ≥ 200 |
| Hypertriglyceridemia      | TG              | < 90       | 90-129     | ≥ 130 |
| Hyper-LDL cholesterolemia | LDL-cholesterol | < 110      | 110-129    | ≥ 130 |
| Hypo-HDL cholesterolemia  | HDL-cholesterol | > 45       | 40-45      | < 40  |

Abbreviations: TC, total cholesterol; TG, triglyceride; LDL, low-density lipoprotein; HDL, high-density lipoprotein. <sup>a</sup> Dyslipidemia was defined as any one or more of hypercholesterolemia, hyper-LDL cholesterolemia, hypertriglyceridemia, or hypo-HDL cholesterolemia.

**Table S2.** Baseline characteristics of the study participants according to TG and HDL-cholesterol levels.

|                                   | TG                                |                                      |                           |                       | HDL-Cholesterol                   |                                     |                          |                       |
|-----------------------------------|-----------------------------------|--------------------------------------|---------------------------|-----------------------|-----------------------------------|-------------------------------------|--------------------------|-----------------------|
|                                   | Acceptable<br>( <i>n</i> = 1,025) | Borderline high<br>( <i>n</i> = 347) | High<br>( <i>n</i> = 187) | <i>p</i> <sup>a</sup> | Acceptable<br>( <i>n</i> = 1,133) | Borderline low<br>( <i>n</i> = 240) | Low<br>( <i>n</i> = 186) | <i>p</i> <sup>a</sup> |
| Age, mean ± SE, years             | 14.2 ± 0.1                        | 14.2 ± 0.2                           | 14.0 ± 0.2                | 0.421                 | 14.0 ± 0.1                        | 14.4 ± 0.2                          | 14.5 ± 0.2               | 0.002                 |
| 10-12 years, n (%)                | 336 (32.8)                        | 122 (35.2)                           | 66 (35.3)                 | 0.153                 | 405 (35.7)                        | 70 (29.2)                           | 49 (26.3)                | 0.008                 |
| 13-15 years, n (%)                | 387 (37.8)                        | 114 (32.9)                           | 67 (35.8)                 |                       | 395 (34.9)                        | 91 (37.9)                           | 82 (44.1)                |                       |
| 16-18 years, n (%)                | 302 (29.5)                        | 111 (32.0)                           | 54 (28.9)                 |                       | 333 (29.4)                        | 79 (32.9)                           | 55 (29.6)                |                       |
| Sex                               |                                   |                                      |                           |                       |                                   |                                     |                          |                       |
| Boys, n (%)                       | 546 (53.3)                        | 169 (48.7)                           | 91 (48.7)                 | 0.734                 | 550 (48.5)                        | 136 (56.7)                          | 120 (64.5)               | 0.002                 |
| Girls, n (%)                      | 479 (46.7)                        | 178 (51.3)                           | 96 (51.3)                 |                       | 583 (51.5)                        | 104 (43.3)                          | 66 (35.5)                |                       |
| BMI, mean ± SE, kg/m <sup>2</sup> | 20.2 ± 0.1                        | 21.5 ± 0.2                           | 23.1 ± 0.4                | <0.0001               | 20.3 ± 0.1                        | 22.1 ± 0.3                          | 22.4 ± 0.3               | <0.0001               |
| Normal weight, n (%)              | 867 (84.6)                        | 254 (73.2)                           | 108 (57.8)                | <0.0001               | 944 (83.3)                        | 171 (71.3)                          | 114 (61.3)               | <0.0001               |
| Overweight and obesity, n (%)     | 158 (15.4)                        | 93 (26.8)                            | 79 (42.2)                 |                       | 189 (16.7)                        | 69 (28.8)                           | 72 (38.7)                |                       |
| Smoking status                    |                                   |                                      |                           |                       |                                   |                                     |                          |                       |
| Never smokers, n (%)              | 910 (88.8)                        | 306 (88.2)                           | 172 (92.0)                | 0.224                 | 1,017 (89.8)                      | 208 (86.7)                          | 163 (87.6)               | 0.424                 |
| Smokers, n (%)                    | 115 (11.2)                        | 41 (11.8)                            | 15 (8.0)                  |                       | 116 (10.2)                        | 32 (13.3)                           | 23 (12.4)                |                       |
| Household income level            |                                   |                                      |                           |                       |                                   |                                     |                          |                       |
| Quintile 1, n (%)                 | 127 (12.4)                        | 58 (16.7)                            | 31 (16.6)                 | 0.595                 | 154 (13.6)                        | 34 (14.2)                           | 28 (15.1)                | 0.851                 |
| Quintile 2, n (%)                 | 200 (19.5)                        | 76 (21.9)                            | 46 (24.6)                 |                       | 228 (20.1)                        | 53 (22.1)                           | 41 (22.0)                |                       |
| Quintile 3, n (%)                 | 235 (22.9)                        | 66 (19.0)                            | 42 (22.5)                 |                       | 256 (22.6)                        | 52 (21.7)                           | 35 (18.8)                |                       |
| Quintile 4, n (%)                 | 214 (20.9)                        | 77 (22.2)                            | 31 (16.6)                 |                       | 232 (20.5)                        | 45 (18.8)                           | 45 (24.2)                |                       |
| Quintile 5, n (%)                 | 249 (24.3)                        | 70 (20.2)                            | 37 (19.8)                 |                       | 263 (23.2)                        | 56 (23.3)                           | 37 (19.9)                |                       |
| Physical activity                 |                                   |                                      |                           |                       |                                   |                                     |                          |                       |
| Inactive, n (%)                   | 461 (45.0)                        | 158 (45.5)                           | 84 (44.9)                 | 0.435                 | 538 (47.5)                        | 95 (39.6)                           | 70 (37.6)                | 0.002                 |
| Minimally active, n (%)           | 308 (30.0)                        | 114 (32.9)                           | 62 (33.2)                 |                       | 327 (28.9)                        | 93 (38.8)                           | 64 (34.4)                |                       |
| Active, n (%)                     | 256 (25.0)                        | 75 (21.6)                            | 41 (21.9)                 |                       | 268 (23.7)                        | 52 (21.7)                           | 52 (28.0)                |                       |
| Menstruation (for girls)          |                                   |                                      |                           |                       |                                   |                                     |                          |                       |
| Premenarcheal, n (%)              | 102 (21.3)                        | 39 (21.9)                            | 28 (29.2)                 | 0.345                 | 130 (22.3)                        | 24 (23.1)                           | 15 (22.7)                | 0.623                 |

|                                                  |                    |                    |                    |       |                    |                    |                    |       |
|--------------------------------------------------|--------------------|--------------------|--------------------|-------|--------------------|--------------------|--------------------|-------|
| Postmenarcheal, n (%)                            | 377 (78.7)         | 139 (78.1)         | 68 (70.8)          |       | 453 (77.7)         | 80 (76.9)          | 51 (77.3)          |       |
| Total energy intake, mean $\pm$ SE, kcal/day     | 2,209.9 $\pm$ 31.3 | 2,153.6 $\pm$ 58.0 | 2,141.6 $\pm$ 80.2 | 0.126 | 2,171.0 $\pm$ 30.7 | 2,204.6 $\pm$ 75.6 | 2,273.5 $\pm$ 83.9 | 0.099 |
| Survey year                                      |                    |                    |                    |       |                    |                    |                    |       |
| 2010, n (%)                                      | 193 (18.8)         | 83 (23.9)          | 47 (25.1)          | 0.332 | 215 (19.0)         | 57 (23.8)          | 51 (27.4)          | 0.166 |
| 2011, n (%)                                      | 236 (23.0)         | 57 (16.4)          | 41 (21.9)          |       | 245 (21.6)         | 51 (21.3)          | 38 (20.4)          |       |
| 2012, n (%)                                      | 218 (21.3)         | 65 (18.7)          | 35 (18.7)          |       | 241 (21.3)         | 49 (20.4)          | 28 (15.1)          |       |
| 2013, n (%)                                      | 202 (19.7)         | 84 (24.2)          | 32 (17.1)          |       | 224 (19.8)         | 55 (22.9)          | 39 (21.0)          |       |
| 2016, n (%)                                      | 176 (17.2)         | 58 (16.7)          | 32 (17.1)          |       | 208 (18.4)         | 28 (11.7)          | 30 (16.1)          |       |
| Blood Hg concentration, mean $\pm$ SE, $\mu$ g/L | 2.1 $\pm$ 0        | 2.1 $\pm$ 0.1      | 2.0 $\pm$ 0.1      | 0.841 | 2.1 $\pm$ 0        | 2.0 $\pm$ 0.1      | 2.2 $\pm$ 0.1      | 0.687 |

Abbreviations: HDL, high-density lipoprotein; SE, standard error; BMI, body mass index; Hg, mercury. <sup>a</sup> *p*-value was calculated using ANOVA test for continuous variable and Rao-Scott Chi-Square test for categorical variable.

**Table S3.** Covariates according to blood Hg distribution.

|                                          | Blood Hg concentration         |                                |                                | <i>p</i> <sup>a</sup> |
|------------------------------------------|--------------------------------|--------------------------------|--------------------------------|-----------------------|
|                                          | Tertile 1<br>( <i>n</i> = 519) | Tertile 2<br>( <i>n</i> = 520) | Tertile 3<br>( <i>n</i> = 520) |                       |
| Age, mean ± SE, years                    | 14.1 ± 0.1                     | 14.2 ± 0.1                     | 14.2 ± 0.1                     | 0.745                 |
| 10-12 years, n (%)                       | 170 (32.8)                     | 180 (34.6)                     | 174 (33.5)                     | 0.263                 |
| 13-15 years, n (%)                       | 184 (35.5)                     | 177 (34.0)                     | 207 (39.8)                     |                       |
| 16-18 years, n (%)                       | 165 (31.8)                     | 163 (31.3)                     | 139 (26.7)                     |                       |
| Sex                                      |                                |                                |                                |                       |
| Boys, n (%)                              | 251 (48.4)                     | 270 (51.9)                     | 285 (54.8)                     | 0.188                 |
| Girls, n (%)                             | 268 (51.6)                     | 250 (48.1)                     | 235 (45.2)                     |                       |
| BMI, mean ± SE, kg/m <sup>2</sup>        | 20.5 ± 0.2                     | 20.8 ± 0.2                     | 21.3 ± 0.2                     | 0.0004                |
| Normal weight, n (%)                     | 436 (84.0)                     | 414 (79.6)                     | 379 (72.9)                     | 0.022                 |
| Overweight and obesity, n (%)            | 83 (16.0)                      | 106 (20.4)                     | 141 (27.1)                     |                       |
| Smoking status                           |                                |                                |                                |                       |
| Never smokers, n (%)                     | 472 (90.9)                     | 454 (87.3)                     | 462 (88.8)                     | 0.396                 |
| Smokers, n (%)                           | 47 (9.1)                       | 66 (12.7)                      | 58 (11.2)                      |                       |
| Household income level                   |                                |                                |                                |                       |
| Quintile 1, n (%)                        | 77 (14.8)                      | 63 (12.1)                      | 76 (14.6)                      | 0.034                 |
| Quintile 2, n (%)                        | 108 (20.8)                     | 122 (23.5)                     | 92 (17.7)                      |                       |
| Quintile 3, n (%)                        | 133 (25.6)                     | 109 (21.0)                     | 101 (19.4)                     |                       |
| Quintile 4, n (%)                        | 106 (20.4)                     | 97 (18.7)                      | 119 (22.9)                     |                       |
| Quintile 5, n (%)                        | 95 (18.3)                      | 129 (24.8)                     | 132 (25.4)                     |                       |
| Physical activity                        |                                |                                |                                |                       |
| Inactive, n (%)                          | 252 (48.6)                     | 227 (43.7)                     | 224 (43.1)                     | 0.102                 |
| Minimally active, n (%)                  | 164 (31.6)                     | 161 (31.0)                     | 159 (30.6)                     |                       |
| Active, n (%)                            | 103 (19.8)                     | 132 (25.4)                     | 137 (26.3)                     |                       |
| Menstruation (for girls)                 |                                |                                |                                |                       |
| Premenarcheal, n (%)                     | 46 (17.2)                      | 65 (26.0)                      | 58 (24.7)                      | 0.010                 |
| Postmenarcheal, n (%)                    | 222 (82.8)                     | 185 (74.0)                     | 177 (75.3)                     |                       |
| Total energy intake, mean ± SE, kcal/day | 2090.2 ± 39.9                  | 2170.5 ± 46.1                  | 2300.6 ± 53.0                  | 0.0002                |
| Survey year                              |                                |                                |                                |                       |
| 2010, n (%)                              | 62 (11.9)                      | 107 (20.6)                     | 154 (29.6)                     | <0.0001               |
| 2011, n (%)                              | 108 (20.8)                     | 109 (21.0)                     | 117 (22.5)                     |                       |
| 2012, n (%)                              | 106 (20.4)                     | 125 (24.0)                     | 87 (16.7)                      |                       |
| 2013, n (%)                              | 133 (25.6)                     | 99 (19.0)                      | 86 (16.5)                      |                       |
| 2016, n (%)                              | 110 (21.2)                     | 80 (15.4)                      | 76 (14.6)                      |                       |

Abbreviations: Hg, mercury; SE, standard error; BMI, body mass index. <sup>a</sup> *p*-value was calculated using ANOVA test for continuous variable and Rao-Scott Chi-Square test for categorical variable.

**Table S4.** Associations between blood Hg concentration and prevalence of hypercholesterolemia and hyper-LDL cholesterolmia according to sex.

|                          | Concentration | Overall    |                          |                          | Boys       |                          |                          | Girls      |                          |                          |
|--------------------------|---------------|------------|--------------------------|--------------------------|------------|--------------------------|--------------------------|------------|--------------------------|--------------------------|
|                          | range (µg/L)  | Case/total | OR (95% CI) <sup>a</sup> | OR (95% CI) <sup>b</sup> | Case/total | OR (95% CI) <sup>a</sup> | OR (95% CI) <sup>b</sup> | Case/total | OR (95% CI) <sup>a</sup> | OR (95% CI) <sup>b</sup> |
| Hypercholesterolemia     |               |            |                          |                          |            |                          |                          |            |                          |                          |
| Continuous               |               | 525/1,559  | 1.39 (1.07, 1.80)        | 1.50 (1.15, 1.97)        | 224/806    | 1.63 (1.17, 2.28)        | 1.74 (1.23, 2.46)        | 301/753    | 1.28 (0.86, 1.89)        | 1.23 (0.80, 1.90)        |
| Tertile 1                | 0.192–1.531   | 157/519    | 1.00 (Reference)         | 1.00 (Reference)         | 53/251     | 1.00 (Reference)         | 1.00 (Reference)         | 104/268    | 1.00 (Reference)         | 1.00 (Reference)         |
| Tertiles 2 and 3         | 1.532–11.761  | 368/1,040  | 1.32 (0.99, 1.76)        | 1.41 (1.05, 1.90)        | 171/555    | 1.82 (1.19, 2.79)        | 2.02 (1.30, 3.14)        | 197/485    | 1.08 (0.73, 1.59)        | 1.01 (0.66, 1.54)        |
| Hyper-LDL cholesterolmia |               |            |                          |                          |            |                          |                          |            |                          |                          |
| Continuous               |               | 317/1,559  | 1.42 (1.05, 1.94)        | 1.37 (0.99, 1.90)        | 148/806    | 1.78 (1.20, 2.64)        | 1.65 (1.06, 2.57)        | 169/753    | 1.20 (0.75, 1.91)        | 1.13 (0.68, 1.87)        |
| Tertile 1                | 0.192–1.531   | 94/519     | 1.00 (Reference)         | 1.00 (Reference)         | 32/251     | 1.00 (Reference)         | 1.00 (Reference)         | 62/268     | 1.00 (Reference)         | 1.00 (Reference)         |
| Tertiles 2 and 3         | 1.532–11.761  | 223/1,040  | 1.23 (0.86, 1.76)        | 1.18 (0.82, 1.70)        | 116/555    | 1.94 (1.16, 3.24)        | 1.88 (1.10, 3.20)        | 107/485    | 0.91 (0.58, 1.43)        | 0.83 (0.51, 1.35)        |

Abbreviations: LDL, low-density lipoprotein; OR, odds ratio; CI, confidence interval. <sup>a</sup> OR (95% CI) was calculated using univariate logistic regression. <sup>b</sup> OR (95% CI) was calculated using multivariate logistic regression adjusted for age (years, continuous), sex (for boys and girls combined), BMI (kg/m<sup>2</sup>, continuous), survey year (2010, 2011, 2012, 2013, and 2016), total energy intake (kcal/day, continuous), smoking status (never smokers and smokers), household income level (quintile 1, 2, 3, 4, and 5), physical activity (inactive, minimally active, and active), and menstruation (for girls, premenarcheal and postmenarcheal).

**Table S5.** Associations between blood Hg concentration and prevalence of overt hypercholesterolemia and hyper-LDL cholesterolmia according to sex.

| Concentration<br>range (µg/L)  | Overall      |                          |                          | Boys       |                          |                          | Girls      |                          |                          |
|--------------------------------|--------------|--------------------------|--------------------------|------------|--------------------------|--------------------------|------------|--------------------------|--------------------------|
|                                | Case/total   | OR (95% CI) <sup>a</sup> | OR (95% CI) <sup>b</sup> | Case/total | OR (95% CI) <sup>a</sup> | OR (95% CI) <sup>b</sup> | Case/total | OR (95% CI) <sup>a</sup> | OR (95% CI) <sup>b</sup> |
| Overt hypercholesterolemia     |              |                          |                          |            |                          |                          |            |                          |                          |
| Continuous                     | 130/1,164    | 1.47 (0.96, 2.25)        | 1.61 (1.03, 2.53)        | 53/635     | 2.13 (1.24, 3.66)        | 2.04 (1.15, 3.64)        | 77/529     | 1.20 (0.63, 2.30)        | 1.29 (0.64, 2.61)        |
| Tertile 1                      | 0.192–1.531  | 37/399                   | 1.00 (Reference)         | 11/209     | 1.00 (Reference)         | 1.00 (Reference)         | 26/190     | 1.00 (Reference)         | 1.00 (Reference)         |
| Tertiles 2 and 3               | 1.532–9.618  | 93/765                   | 1.49 (0.89, 2.48)        | 42/426     | 2.30 (1.02, 5.19)        | 2.36 (1.00, 5.54)        | 51/339     | 1.19 (0.62, 2.29)        | 1.22 (0.63, 2.35)        |
| Overt hyper-LDL cholesterolmia |              |                          |                          |            |                          |                          |            |                          |                          |
| Continuous                     | 93/1,335     | 1.85 (1.07, 3.21)        | 1.79 (1.04, 3.08)        | 39/697     | 3.92 (2.10, 7.35)        | 3.20 (1.55, 6.62)        | 54/638     | 1.03 (0.44, 2.42)        | 1.10 (0.47, 2.55)        |
| Tertile 1                      | 0.192–1.531  | 24/449                   | 1.00 (Reference)         | 6/225      | 1.00 (Reference)         | 1.00 (Reference)         | 18/224     | 1.00 (Reference)         | 1.00 (Reference)         |
| Tertiles 2 and 3               | 1.532–11.761 | 69/886                   | 1.34 (0.74, 2.45)        | 33/472     | 3.09 (1.10, 8.73)        | 2.64 (0.94, 7.36)        | 36/414     | 0.88 (0.41, 1.89)        | 0.91 (0.43, 1.94)        |

Abbreviations: LDL, low-density lipoprotein; OR, odds ratio; CI, confidence interval. <sup>a</sup> OR (95% CI) was calculated using univariate logistic regression. <sup>b</sup> OR (95% CI) was calculated using multivariate logistic regression adjusted for age (years, continuous), sex (for boys and girls combined), BMI (kg/m<sup>2</sup>, continuous), survey year (2010, 2011, 2012, 2013, and 2016), total energy intake (kcal/day, continuous), smoking status (never smokers and smokers), household income level (quintile 1, 2, 3, 4, and 5), physical activity (inactive, minimally active, and active), and menstruation (for girls, premenarcheal and postmenarcheal).
